# Supplementary material for: The Effect of Cash Transfer on Maternal and Child Health Outcomes: A Systematic Review in Sub-Saharan Africa
Source: Research Square preprint supplement (doi:10.21203/rs.3.rs-1655009/v1), 2022-05-26
Supplement: Supplementary file 1 [file e801305b7347ebbc5c5ef2ad.docx]

# **Appendix**

**List of studies included for full review**

| Author(s) | Year | N (Sample) | Target Population | Exposure/Intervention | Outcome(s) assessed | Methods | Confounders |
| --- | --- | --- | --- | --- | --- | --- | --- |
| Winnie K Luseno, Kavita Singh, Sudhanshu Handa, Chirayath Suchindran | 2014 | 1197 | Children 6-17 years | Cash transfer program to address poor school-age children health outcomes (4 villages groups were randomly selected to receive cash transfer and 4 others did not). Amount of cash depended on the household size. **CCT** | - Illness in past month - Illness that stopped normal activities in the past month - Missing school due to illness or injury in the past month - Health care use for worst illness in past year | Multilevel logistic regression model | - Household-level variables (e.g., number of working age adults, number of sick adults in past 30 days, age head of household, sex head of household (HH), education head of household, number of children) - Child-level variables (maternal orphan, paternal orphan, double orphan, child sex) - control variables (age, relationship to HH, control for outcome at baseline) |
| Sudhanshu Handa, Carolyn Tucker Halpern, Audrey Pettifor, Harsha Thirumurthy | 2014 | - | Orphans Vulnerable Children (OVC), aged 0-17 years | Unconditional cash transfer of $20 per month to caregivers of young people. **UCT** | - Sexual debut - Sexual behaviors (e.g., condom use, number of partners, transactional sex) | Logistic regression model | Age of head, sex of head, education of head, relationship of child to respondent, residence, sex of child, age of child |
| Gustavo Angeles, Jacobus de Hoop, Sudhanshu Handa, Kelly Kilburn, Annamaria Milazzo, Amber Peterman | 2019 | 3531 SCTP eligible households 2782 youth | 13-19 | Unconditional cash transfer **UCT** | - 10-items short form of CES-D scale - Depressive symptoms | Intention-to-treat using ANCOVA & Difference in difference for sensitivity analysis | Baseline youth characteristics (age, single or double orphan), baseline household characteristics (sex of caregivers, literacy status, household size) traditional authority ID |
| Carolyn Huang, Kavita Singh, Sudhanshu Handa, Carolyn Halpern, Audrey Pettifor, Harsha Thirumurthy | 2017 | 0-7 years and under 5 years of age |  | Unconditional cash transfer of $20 per month to caregivers of young people | Incidence of illness (malaria/pneumonia) Health seeking behaviors | Generalized Linear Latent and mixed method estimation | Individual level (age, sex, orphan, relationship to HH, low Haz, low BMIZ) Characteristics of the head of household (education, age, sex). Environmental factors (household size, living environment index, crowding index, cook stove, cook fuel, toilet, diet diversity score, food groups as a proportion of diet) Wealth: monthly per capita income, livestock index Community characteristics (distance malaria treatment, distance doctor, residence: rural/urban) |
| Kelly Kilburn, Harsha Thirumurthy, Carolyn Tucker Halpern, Audrey Pettifor, Sudhanshu Handa | 2016 | 2,210 | 15-24 young persons | **UCT** (CT-OVC) | CES-D (Depression Index) | Logistic regression model (estimating Presence of depressive symptoms) | Age, sex, participant's relationship to head of HH, head of household characteristics (sex, age, schooling attainment), Nairobi residence status, indicator of morbidity status (except for physical outcomes) |
| Marie CD STONER, Audrey PETTIFOR, Jessie K. EDWARDS, Allison E. AIELLO, Carolyn T HALPERN, Aimée JULIEN, Amanda SELIN, Rhian TWINE, James P. HUGHES, Jing WANG, Yaw AGYEI, F. Xavier GOMEZ-OLIVE, Ryan G. WAGNER, Catherine MACPHAIL, Kathleen KAHN | 2018 | 2,328 | 13 - 20 years | CCT conditional on school attendance | Incidence of HIV and HSV-2 | Inverse probability-of-exposure weighted survival curves and a marginal structural Cox model. | Age, household wealth, ever repeated a grade, partner in 5 years or older, double, or single orphan, maximum age difference with partners, ever had sex, unprotected sex in last 3 months, given money or gift in exchange for sex, alcohol use, children depression index, children manifest depression index |
| Kelly Kilburn, Sudhanshu Handa, Gustavo Angeles, Maxton Tsoka, Peter Mvula | 2018 |  | Ultra-poor population (identified by appointed community leaders) | **UCT** | Subjective Well-being (SWB): QoL, future expectations, and relative well-being | Difference in Difference regression model | Control variables included individual and household characteristics plus a full set of treatment-covariate interactions |
| Edward N. Okeke, Isa S. Abubakar | 2020 | 10582 women | Pregnant women | CCT | Child survival, fetal loss, fetal death, stillborn, infant death (neonatal vs post-natal death) | ITT | dummies for mother’s age (<18, 18–24, 25–29,30–34, and>35 years), dummies for mother’s educational attainment (no schooling, Islamic schooling, some primary school, some secondary school, and some tertiary schooling), a dummy denoting Hausa or Fulani extraction, dummies for mother’s number of prior births, dummies indicating a prior fetal loss or a stillbirth, and household wealth quintile dummies |
| Jenny X. Liu, Jennifer Shen, Nicholas Wilson, Svetha Janumpalli, Patrick Stadler, Nancy Padian | 2019 | 554 | Pregnant women tested HIV positive | PMTCT | Administration of nevirapine, administration of EID | ITT |  |
| Nadia Nguyen, Kimberly A. Powers, William C. Miller, Annie Green Howard, Carolyn T. Halpern, James P. Hughes, Jing Wang, Rhian Twine, Xavier Gomez-Olive, Catherine MacPhail, Kathleen Kahn, Audrey E. Pettifor | 2019 | 1,034 | Young girls 13 - 23 | - Sexual Partners Out of school older partner - Anonymous out of school partner | Incidence of HIV | Latent Class Analysis |  |
| Luisa Natali, Sudhanshu Handa, Amber Peterman, David Seidenfeld, Gelson Tembo, On behalf of the Zambia Cash Transfer Evaluation Team | 2018 |  | Women who are primary caregiver of eligible child | UCT | - Happiness - Child's wellbeing | Linear probability | woman’s age, education and marital status, household size and household demographic composition, and districts. Each outcome in column 3–12 reflects the woman’s level of agreement with each of these statements measured using a five-point Likert Scale ranging from one to five (where 1 capture strong disagreement and 5 strong agreement) |
| Edward N. Okeke, Zachary Wagner, Isa S. Abubakar | 2020 | 180 Primary Health Facility/1.2M people | Pregnant women | CCT to deliver in hospitals | - Mother's General Health - Delivery complications | ITT |  |
| Christopher R Sudfeld, Lilia Bliznashka, Geofrey Ashery, Aisha K Yousafzai, Honorati Masanja | 2021 | 12 Villages | Pregnant women with child < 1 year | Community Health Worker (CHW) alone or CHW with CCT | - Child Cognitive, language and motor development (Bayley scale) - Child length / height-for-age-z-score (HAZ) | ITT |  |
| Jessica Londeree Saleska, Abigail Norris Turner, Maria F. Gallo, Abigail Shoben, Bienvenu Kawende, Noro Lantoniaina Rosa Ravelomanana, Harsha Thirumurthy, Marcel Yotebieng | 2021 | 434 HIV pregnant women | HIV positive women | CCT | - Retention in HIV care - Uptake of prevention of mother-to-child transmission services | Binomial models | Wealth index, depression symptoms, alcohol use in pregnancy |
| Yousafzai, Aisha K1 (AUTHOR), Asheri, Geofrey2 (AUTHOR), Masanja, Honorati2 (AUTHOR), Sudfeld, Christopher R1,3 (AUTHOR) | 2020 | 12 villages | Pregnant women and children | CHW, CHW + CCT | Maternal depressive symptoms | Hopkins Symptoms Check List 25 (HSCL-25) | age, pregnancy status at enrollment, education, parity, marital status, perceived social support, household wealth, child age |
| Angeles, Gustavo, de Hoop, Jacobus, Handa, Sudhanshu, Kilburn, Kelly, Milazzo, Annamaria, Peterman, Amber | 2019 | 330,000 households |  | CCT | Child anthropometry | 10-items short form of CES-D scale |  |
| Ryoko Sato and Benjamin Fintan | 2019 | 2,530 Women 15-35 | Women 15-35 years | CCT | Tetanus toxoid vaccination | Logistic regression model | Sociodemographic, distance to clinic, transport to clinic |
